# Supplementary material
Source: PubMed Central journal article supplement (PMC6248204)

## Supplementary Online Content

Bouck Z, Mecredy GC, Ivers NM, et al. Frequency and associations of prescription nonsteroidal anti-inflammatory drug use among patients with a musculoskeletal disorder and hypertension, heart failure, or chronic kidney disease. *JAMA Intern Med*. Published online October 8, 2018. doi:10.1001/jamainternmed.2018.4273

**eTable 1.** Inclusion Criteria and Index Event Definitions

**eTable 2.** Primary and Secondary Outcome Definitions

**eTable 3.** Preliminary Analysis of Distribution of NSAIDs Prescribed Within 30 Days of Musculoskeletal-Related Primary Care Visit by Number of Days Since Visit Occurred

**eTable 4.** Distribution of Baseline Characteristics by Primary Outcome for Unmatched (n = 396,248) and Matched Samples (n = 71,104)

**eTable 5.** 2x2 Tables for McNemar's Test of Correlated Binary Proportions for Overall Matched Sample and Sample Stratified by History of Hypertension

**eFigure 1.** Prescription Nonsteroidal Anti-inflammatory Drug (NSAID) Use by Health Region (LHIN), 2010-11 to 2015-16

**eFigure 2.** Prescription Nonsteroidal Anti-inflammatory Drug (NSAID) Use by Primary Care Practice Group, 2010-11 to 2015-16

This supplementary material has been provided by the authors to give readers additional information about their work.

**eTable 1.** Inclusion Criteria and Index Event Definitions

| Description                                                                                | Definition(s)                                                                                                                                                                                               |                        |                                                                                                                                                                                                                                                                                       |                                                                                                         |
|--------------------------------------------------------------------------------------------|-------------------------------------------------------------------------------------------------------------------------------------------------------------------------------------------------------------|------------------------|---------------------------------------------------------------------------------------------------------------------------------------------------------------------------------------------------------------------------------------------------------------------------------------|---------------------------------------------------------------------------------------------------------|
| <b>Primary care outpatient visit for a musculoskeletal (MSK) disorder</b><br>(index event) | At least one OHIP claim for an in-office physician visit (i.e. LOCATION=O='Office') with a general practitioner (SPEC=00='general practitioner/family physician) and any of the following diagnostic codes: |                        |                                                                                                                                                                                                                                                                                       |                                                                                                         |
|                                                                                            | MSK type                                                                                                                                                                                                    | Subcategory            | Descriptions                                                                                                                                                                                                                                                                          | OHIP diagnostic codes                                                                                   |
| <i>Injury and related conditions</i>                                                       | <i>Injury and related conditions</i>                                                                                                                                                                        | Fractures/dislocations | Fractures: facial bones, skull, vertebral column without spinal damage, vertebral column with spinal damage, ribs, pelvis, clavicle, humerus, radius/ulna, carpal bones, metacarpals, phalanges, femur, fibula/tibia, ankle, leg, other; Dislocations: shoulder, elbow, finger, other | 802, 803, 805, 806, 807, 808, 810, 812, 813, 814, 815, 816, 821, 823, 824, 827, 829, 831, 832, 834, 839 |
|                                                                                            |                                                                                                                                                                                                             | Strains/sprains        | shoulder/upper arm, elbow, wrist/hand and fingers, knee/leg, ankle/foot & toes, coccyx/neck, other                                                                                                                                                                                    | 840, 841, 842, 843, 844, 845, 847, 848                                                                  |
|                                                                                            | <i>Arthritis and related conditions</i>                                                                                                                                                                     | Inflammatory arthritis | rheumatoid arthritis, Still's disease; ankylosing spondylitis; disseminated lupus erythematosus, scleroderma, polyarteritis nodosa, temporal arteritis; pyogenic arthritis                                                                                                            | 714, 720, 710, 446, 711                                                                                 |
|                                                                                            |                                                                                                                                                                                                             | Other arthritis        | osteoarthritis; injurytic arthritis; gout                                                                                                                                                                                                                                             | 715, 716, 274, 712                                                                                      |
|                                                                                            |                                                                                                                                                                                                             | Soft tissue disorders  | synovitis, tenosynovitis, bursitis, bunion, ganglion; Dupuytren's contracture; fibrositis, myositis, muscular rheumatism                                                                                                                                                              | 727, 728, 729                                                                                           |
|                                                                                            |                                                                                                                                                                                                             | Joint derangement      | joint derangement, recurrent dislocation, ankylosis, meniscus or cartilage tear, loose body in joint                                                                                                                                                                                  | 717, 718                                                                                                |
|                                                                                            | <i>Bone and spinal conditions</i>                                                                                                                                                                           | Unspecified arthritis  |                                                                                                                                                                                                                                                                                       | 739                                                                                                     |
|                                                                                            |                                                                                                                                                                                                             | Bone                   | osteomyelitis, osteochondritis, Legg-Perthes disease, osteoporosis, spontaneous fracture, oth. dis. of bone & cart., flat foot, pes planus, hallux valgus, hallux varus, hammer toe                                                                                                   | 730, 731, 732, 733, 734, 735                                                                            |
|                                                                                            |                                                                                                                                                                                                             | Spine                  | cervical arthritis, intervertebral disc                                                                                                                                                                                                                                               | 721, 722, 723, 724, 725, 737                                                                            |

|                                                                      |                                                                                                                                                                                                                                                                                                                                                                                                                                                                                                                                                                                                                                                      |                                                                                                                   |               |
|----------------------------------------------------------------------|------------------------------------------------------------------------------------------------------------------------------------------------------------------------------------------------------------------------------------------------------------------------------------------------------------------------------------------------------------------------------------------------------------------------------------------------------------------------------------------------------------------------------------------------------------------------------------------------------------------------------------------------------|-------------------------------------------------------------------------------------------------------------------|---------------|
|                                                                      |                                                                                                                                                                                                                                                                                                                                                                                                                                                                                                                                                                                                                                                      | disorders, pain neck, lumbar strain, lumbago, coccydynia, sciatica, lumbar disc disease (degenerative), scoliosis |               |
|                                                                      | <i>Congenital anomalies</i>                                                                                                                                                                                                                                                                                                                                                                                                                                                                                                                                                                                                                          | club foot, other congenital anomalies of limbs, other musculoskeletal anomalies                                   | 754, 755, 756 |
|                                                                      | <i>Unspecified</i>                                                                                                                                                                                                                                                                                                                                                                                                                                                                                                                                                                                                                                   | Include ill-defined symptoms such as leg or joint pain                                                            | 781           |
| <b>History of heart failure*</b> (inclusion criteria)                | At least one claim in OHIP with one of the following diagnostic codes in 365 days prior to index event:<br>428 (congestive heart failure)<br><b>OR</b><br>At least one emergency department visit [NACRS] or hospital discharge [DAD] record with ICD-10 code = I50 (heart failure)                                                                                                                                                                                                                                                                                                                                                                  |                                                                                                                   |               |
| <b>History of hypertension*</b> (inclusion criteria)                 | At least one claim in OHIP with one of the following diagnostic codes in 365 days prior to index event:<br>o 401 = Essential hypertension<br>o 402 = Hypertensive heart disease<br>o 403 = Hypertensive renal disease<br><b>OR</b><br>One claim for an outpatient visit or hospital stay with one of the following diagnostic codes [NACRS, DAD]:<br>o I10 = essential hypertension<br>o I11 = hypertensive heart disease (could be with or without heart failure)<br>o I12 = hypertensive renal (chronic kidney) disease<br>o I13 = hypertensive heart and renal disease (could be with or without heart failure)<br>o I15 = secondary hypertension |                                                                                                                   |               |
| <b>History of chronic kidney disease (CKD)*</b> (inclusion criteria) | At least one claim in OHIP with one of the following diagnostic codes in 365 days prior to index event: 403, 585<br><b>OR</b><br>At least one hospital admission in CIHI DAD or an outpatient visit in NACRS with one of the following codes: E102, E112, E132, E142, I12, I13, N08, N18, N19                                                                                                                                                                                                                                                                                                                                                        |                                                                                                                   |               |

Notes: \* In defining the **primary exposure variables**, there is some overlap among the operational definitions of these diseases across both ICD-10-CA and OHIP diagnostic codes.

All scenarios where multiple conditions (at least two of three) can be indicated on a single claim:

1. IF [DAD, NACRS] claim with DX10CODE I11 AND I50 then  
**History of heart failure = 1 AND history of hypertension = 1**
2. IF [DAD, NACRS] claim with DX10CODE (I12 OR I13) AND DX10CODE N18 then  
**History of hypertension = 1 AND history of chronic kidney disease = 1**  
Same is true IF one [OHIP] claim with DXCODE = 403 then  
**History of hypertension = 1 AND history of chronic kidney disease = 1**
3. IF [DAD, NACRS] claim with DX10CODE = I13 AND N18 AND I50 then  
**History of hypertension = 1 AND history of chronic kidney disease = 1 AND history of heart failure = 1**

**eTable 2.** Primary and Secondary Outcome Definitions

| Description (type) and definition                                                                                                                                                                                      | Generic drug name                           | DINs                                                                                                                                                                                                                                                                                           |
|------------------------------------------------------------------------------------------------------------------------------------------------------------------------------------------------------------------------|---------------------------------------------|------------------------------------------------------------------------------------------------------------------------------------------------------------------------------------------------------------------------------------------------------------------------------------------------|
| <b>Prescription NSAID use</b> (primary) - Receipt of one or more ODB claims for any DIN <sup>a</sup> (corresponding with any of the listed generic drugs) within 7 days <sup>b</sup> after patient's index visit date. | Celecoxib**                                 | 2239941, 2239942, 2288915, 2288923, 2291975, 2291983, 2321246, 2321254, 2355442, 2355450, 2399881, 2412373, 2412381, 2412497, 2412500, 2418932, 2418940, 2420058, 2420066, 2420155, 2420163, 2423278, 2424533, 2424541, 2426382, 2426390, 2435632, 2435640, 2442639, 2442647, 2445670, 2445689 |
|                                                                                                                                                                                                                        | Diclofenac potassium                        | 881635, 2239355, 2239753, 2243433, 2261774                                                                                                                                                                                                                                                     |
|                                                                                                                                                                                                                        | Diclofenac sodium***                        | 514004, 514012, 590827, 632724, 632732, 782459, 808539, 808547, 839175, 839183, 2048698, 2091194, 2158582, 2162814, 2231504, 2231505, 2231506, 2231508, 2261901, 2261928, 2261936, 2261944, 2261960, 2302616, 2302624                                                                          |
|                                                                                                                                                                                                                        | Diclofenac sodium & misoprostol             | 1917056, 2229837, 2341689, 2341697, 2397145, 2397153                                                                                                                                                                                                                                           |
|                                                                                                                                                                                                                        | Etodolac                                    | 2142023, 2142031, 2232317, 2232318                                                                                                                                                                                                                                                             |
|                                                                                                                                                                                                                        | Floctafenine                                | 2017628, 2017636, 2244680, 2244681                                                                                                                                                                                                                                                             |
|                                                                                                                                                                                                                        | Flurbiprofen                                | 600792, 647942, 1912038, 1912046, 2100509, 2100517                                                                                                                                                                                                                                             |
|                                                                                                                                                                                                                        | Ibuprofen                                   | 252409, 327794, 364142, 441643, 441651, 484911, 506052, 585114, 629324, 629340, 629359                                                                                                                                                                                                         |
|                                                                                                                                                                                                                        | Indomethacin                                | 16039, 16047, 16233, 337420, 337439, 594466, 2231799, 2231800, 2461536, 2461811                                                                                                                                                                                                                |
|                                                                                                                                                                                                                        | Ketoprofen                                  | 761680, 790427, 790435, 842664, 1926365, 1926373, 1926381, 1926403, 1926411, 2015951, 2172577                                                                                                                                                                                                  |
|                                                                                                                                                                                                                        | Ketorolac tromethamine                      | 2162660, 2229080, 2465124                                                                                                                                                                                                                                                                      |
|                                                                                                                                                                                                                        | Mefenamic acid                              | 155225, 2229452                                                                                                                                                                                                                                                                                |
|                                                                                                                                                                                                                        | Meloxicam                                   | 2242785, 2242786, 2248267, 2248268, 2248973, 2248974, 2250012, 2250020, 2255987, 2255995, 2258315, 2258323, 2390884, 2390892                                                                                                                                                                   |
|                                                                                                                                                                                                                        | Nabumetone                                  | 2083531, 2083558, 2238639, 2240868                                                                                                                                                                                                                                                             |
|                                                                                                                                                                                                                        | Naproxen                                    | 299413, 522651, 522678, 565350, 589861, 592277, 600806, 627097, 2017237, 2162415, 2162423, 2162431, 2162458, 2162474, 2162482, 2162490, 2162792, 2241024, 2243312, 2243313, 2243314, 2243432, 2246699, 2246700, 2246701, 2294702, 2294710                                                      |
|                                                                                                                                                                                                                        | Naproxen sodium                             | 784354, 1940309, 2162717, 2162725                                                                                                                                                                                                                                                              |
|                                                                                                                                                                                                                        | Naproxen & esomeprazole magnesium           | 2361701, 2361728, 2443449, 2458608                                                                                                                                                                                                                                                             |
|                                                                                                                                                                                                                        | Oxaprozin                                   | 2027860, 2243661                                                                                                                                                                                                                                                                               |
|                                                                                                                                                                                                                        | Piroxicam                                   | 525596, 525618, 632716, 642886, 642894, 695696, 695718, 2154463                                                                                                                                                                                                                                |
|                                                                                                                                                                                                                        | Sulindac                                    | 432369, 456888, 745588, 745596                                                                                                                                                                                                                                                                 |
| Tiaprofenic acid                                                                                                                                                                                                       | 1989782, 2179679, 2179687, 2221950, 2230828 |                                                                                                                                                                                                                                                                                                |

|                                                                                                                                                                                                                            |                                                                                                                                                                                                                                                                                                                                                                                                                                                                                                                                                                                      |
|----------------------------------------------------------------------------------------------------------------------------------------------------------------------------------------------------------------------------|--------------------------------------------------------------------------------------------------------------------------------------------------------------------------------------------------------------------------------------------------------------------------------------------------------------------------------------------------------------------------------------------------------------------------------------------------------------------------------------------------------------------------------------------------------------------------------------|
| <b>Cardiac complication</b> (secondary)-<br>Defined as at least one claim with any of the following ICD-10 codes [DAD, NACRS]:                                                                                             | <i>Ischemic heart disease:</i> I20-I25<br><br><i>Heart failure:</i> I50<br><br><i>Other cardiovascular conditions:</i> I00-I02, I05-I13, I15, I26-I28, I30-I40, I44-I49, I51, I52, I60-I74, I77-I82, I95, I97, R02, R55, R57, and R96                                                                                                                                                                                                                                                                                                                                                |
| <b>Renal complication</b> (secondary) -<br>Defined as at least one claim with any of the following codes [DAD, NACRS]:                                                                                                     | <i>Acute kidney injury:</i> <ul style="list-style-type: none"> <li>• ICD code (primary or secondary) = N17, N170-N172, N178-N179</li> </ul><br><i>Acute dialysis:</i> <ul style="list-style-type: none"> <li>• ICD-10 code = G323, G325, G866, R849 (hemodialysis); G330, G331 (peritoneal dialysis); G082, G083, G085, G090-G093, G095, G294, G295 (continuous renal replacement therapy)</li> <li>• CCI code = 1PZ21HQBR (hemodialysis), 1PZ21HQBS (continuous renal replacement therapy), 1PZ21HPD4 (peritoneal dialysis)</li> </ul><br><i>Hyperkalemia</i><br>ICD-10 code = E875 |
| <b>Death</b> (secondary) – all-cause mortality                                                                                                                                                                             | Any claim in [RPDB] with DTHFLAG and DTHDATE                                                                                                                                                                                                                                                                                                                                                                                                                                                                                                                                         |
| <i>Notes:</i> DINs = drug identification numbers; *=aspirin and topical formulations excluded; **only selective (COX-2 inhibitor) NSAID on e-formulary; ***only NSAID with topical formulations on e-formulary (excluded). |                                                                                                                                                                                                                                                                                                                                                                                                                                                                                                                                                                                      |
| <sup>a</sup> All DINs had to be listed on the ODB formulary and covered during the study window.                                                                                                                           |                                                                                                                                                                                                                                                                                                                                                                                                                                                                                                                                                                                      |
| <sup>b</sup> Please refer to <b>Supplemental Table 3</b> for preliminary results that informed length of observation window.                                                                                               |                                                                                                                                                                                                                                                                                                                                                                                                                                                                                                                                                                                      |

**eTable 3.** Preliminary Analysis of Distribution of NSAIDs Prescribed Within 30 Days of Musculoskeletal-Related Primary Care Visit by Number of Days Since Visit Occurred.

| <b>Days</b> | <b>n</b> | <b>%</b> | <b>Cumulative n</b> | <b>Cumulative %</b> |
|-------------|----------|----------|---------------------|---------------------|
| 0           | 148662   | 44.27    | 148662              | 44.27               |
| 1           | 23906    | 7.12     | 172568              | 51.39               |
| 2           | 11798    | 3.51     | 184366              | 54.90               |
| 3           | 8793     | 2.62     | 193159              | 57.52               |
| 4           | 7967     | 2.37     | 201126              | 59.89               |
| 5           | 7290     | 2.17     | 208416              | 62.06               |
| 6           | 7835     | 2.33     | 216251              | 64.39               |
| 7*          | 8574     | 2.55     | 224825              | 66.95               |
| 8           | 6586     | 1.96     | 231411              | 68.91               |
| 9           | 5282     | 1.57     | 236693              | 70.48               |
| 10          | 4831     | 1.44     | 241524              | 71.92               |
| 11          | 4920     | 1.47     | 246444              | 73.38               |
| 12          | 4881     | 1.45     | 251325              | 74.84               |
| 13          | 5604     | 1.67     | 256929              | 76.51               |
| 14          | 7063     | 2.10     | 263992              | 78.61               |
| 15          | 5418     | 1.61     | 269410              | 80.22               |
| 16          | 4453     | 1.33     | 273863              | 81.55               |
| 17          | 4088     | 1.22     | 277951              | 82.77               |
| 18          | 4067     | 1.21     | 282018              | 83.98               |
| 19          | 4166     | 1.24     | 286184              | 85.22               |
| 20          | 4794     | 1.43     | 290978              | 86.65               |
| 21          | 6240     | 1.86     | 297218              | 88.50               |
| 22          | 4883     | 1.45     | 302101              | 89.96               |
| 23          | 4004     | 1.19     | 306105              | 91.15               |
| 24          | 3716     | 1.11     | 309821              | 92.26               |
| 25          | 3700     | 1.10     | 313521              | 93.36               |
| 26          | 3871     | 1.15     | 317392              | 94.51               |
| 27          | 4345     | 1.29     | 321737              | 95.80               |
| 28          | 6002     | 1.79     | 327739              | 97.59               |
| 29          | 4514     | 1.34     | 332253              | 98.94               |
| 30          | 3574     | 1.06     | 335827              | 100.00              |

Notes: \*As most NSAIDs (67.0%) dispensed within 30 days of a musculoskeletal-related visit were claimed within the first week, we set 7 days as our observation window (see eTable 2).

**eTable 4.** Distribution of Baseline Characteristics by Primary Outcome for Unmatched (n = 396,248) and Matched Samples (n = 71,104).

| Variable                       | Value              | Pre-matching sample<br>(all eligible for matching, n = 396,248) |                     |                    | Post-matching sample<br>(n = 71,704) |                    |                    |
|--------------------------------|--------------------|-----------------------------------------------------------------|---------------------|--------------------|--------------------------------------|--------------------|--------------------|
|                                |                    | Prescription NSAID use                                          |                     | Std.<br>difference | Prescription NSAID use               |                    | Std.<br>difference |
|                                |                    | Yes<br>(n = 36,119)                                             | No<br>(n = 360,129) |                    | Yes<br>(n = 35,552)                  | No<br>(n = 35,552) |                    |
| CKD                            | Yes                | 1,612 (4.5%)                                                    | 32,790 (9.1%)       | 0.19               | 1,442 (4.1%)                         | 1,442 (4.1%)       | 0                  |
| Hypertension                   | Yes                | 34,701 (96.1%)                                                  | 332,066 (92.2%)     | 0.17               | 34,300 (96.5%)                       | 34,300 (96.5%)     | 0                  |
| Heart failure                  | Yes                | 1,661 (4.6%)                                                    | 32,463 (9.0%)       | 0.18               | 1,433 (4.0%)                         | 1,433 (4.0%)       | 0                  |
| Back pain                      | Yes                | 6,074 (16.8%)                                                   | 46,976 (13.0%)      | 0.11               | 5,975 (16.8%)                        | 5,659 (15.9%)      | 0.02               |
| Arthritis                      | No                 | 22,147 (61.3%)                                                  | 246,113 (68.3%)     | 0.15               | 21,949 (61.7%)                       | 21,258 (59.8%)     | 0.04               |
| Arthritis                      | Yes - Inflammatory | 763 (2.1%)                                                      | 14,131 (3.9%)       | 0.11               | 761 (2.1%)                           | 819 (2.3%)         | 0.01               |
| Arthritis                      | Yes - Other        | 13,209 (36.6%)                                                  | 99,885 (27.7%)      | 0.19               | 12,842 (36.1%)                       | 13,475 (37.9%)     | 0.04               |
| Age group                      | 65-69 y            | 12,138 (33.6%)                                                  | 98,767 (27.4%)      | 0.13               | 11,997 (33.7%)                       | 12,392 (34.9%)     | 0.02               |
| Age group                      | 70-74 y            | 9,099 (25.2%)                                                   | 81,181 (22.5%)      | 0.06               | 8,953 (25.2%)                        | 9,094 (25.6%)      | 0.01               |
| Age group                      | 75-79 y            | 7,073 (19.6%)                                                   | 72,286 (20.1%)      | 0.01               | 6,946 (19.5%)                        | 6,895 (19.4%)      | 0                  |
| Age group                      | 80-84 y            | 4,650 (12.9%)                                                   | 57,545 (16.0%)      | 0.09               | 4,579 (12.9%)                        | 4,473 (12.6%)      | 0.01               |
| Age group                      | 85+ y              | 3,159 (8.7%)                                                    | 50,350 (14.0%)      | 0.17               | 3,077 (8.7%)                         | 2,698 (7.6%)       | 0.04               |
| Male                           | Yes                | 16,223 (44.9%)                                                  | 145,856 (40.5%)     | 0.09               | 15,916 (44.8%)                       | 15,916 (44.8%)     | 0                  |
| Rural                          | Yes                | 3,152 (8.7%)                                                    | 37,851 (10.5%)      | 0.06               | 2,969 (8.4%)                         | 2,969 (8.4%)       | 0                  |
| Income quintile                | 1 (lowest)         | 7,193 (19.9%)                                                   | 62,343 (17.3%)      | 0.07               | 7,066 (19.9%)                        | 7,066 (19.9%)      | 0                  |
| Income quintile                | 2                  | 7,837 (21.7%)                                                   | 72,394 (20.1%)      | 0.04               | 7,709 (21.7%)                        | 7,709 (21.7%)      | 0                  |
| Income quintile                | 3                  | 7,490 (20.7%)                                                   | 72,382 (20.1%)      | 0.02               | 7,346 (20.7%)                        | 7,346 (20.7%)      | 0                  |
| Income quintile                | 4                  | 7,289 (20.2%)                                                   | 76,749 (21.3%)      | 0.03               | 7,197 (20.2%)                        | 7,197 (20.2%)      | 0                  |
| Income quintile                | 5 (highest)        | 6,310 (17.5%)                                                   | 76,261 (21.2%)      | 0.09               | 6,234 (17.5%)                        | 6,234 (17.5%)      | 0                  |
| Hospitalization in past y      | Yes                | 7,731 (21.4%)                                                   | 116,673 (32.4%)     | 0.25               | 7,508 (21.1%)                        | 7,441 (20.9%)      | 0                  |
| Cancer                         | Yes                | 5,751 (15.9%)                                                   | 73,213 (20.3%)      | 0.11               | 5,640 (15.9%)                        | 5,337 (15.0%)      | 0.02               |
| Cardiovascular disease (other) | Yes                | 8,114 (22.5%)                                                   | 105,901 (29.4%)     | 0.16               | 7,937 (22.3%)                        | 7,372 (20.7%)      | 0.04               |
| ACE-inhibitor or ARB           | No use             | 10,848 (30.0%)                                                  | 148,515 (41.2%)     | 0.24               | 10,731 (30.2%)                       | 10,731 (30.2%)     | 0                  |
| ACE-inhibitor or ARB           | Recent use         | 3,980 (11.0%)                                                   | 31,725 (8.8%)       | 0.07               | 3,735 (10.5%)                        | 3,735 (10.5%)      | 0                  |
| ACE-inhibitor or ARB           | Current use        | 21,291 (58.9%)                                                  | 179,889 (50.0%)     | 0.18               | 21,086 (59.3%)                       | 21,086 (59.3%)     | 0                  |
| Diuretic                       | No use             | 27,477 (76.1%)                                                  | 260,449 (72.3%)     | 0.09               | 27,333 (76.9%)                       | 27,333 (76.9%)     | 0                  |
| Diuretic                       | Recent use         | 1,671 (4.6%)                                                    | 19,252 (5.3%)       | 0.03               | 1,403 (3.9%)                         | 1,403 (3.9%)       | 0                  |
| Diuretic                       | Current use        | 6,971 (19.3%)                                                   | 80,428 (22.3%)      | 0.07               | 6,816 (19.2%)                        | 6,816 (19.2%)      | 0                  |
| Liver disease                  | Yes                | 633 (1.8%)                                                      | 7,740 (2.1%)        | 0.03               | 627 (1.8%)                           | 538 (1.5%)         | 0.02               |
| Prior NSAID use                | Yes                | 8,243 (22.8%)                                                   | 32,024 (8.9%)       | 0.39               | 7,822 (22.0%)                        | 7,228 (20.3%)      | 0.04               |
| Payment model                  | Fee-for-service    | 4,355 (12.1%)                                                   | 39,055 (10.8%)      | 0.04               | 4,304 (12.1%)                        | 4,099 (11.5%)      | 0.02               |
| Payment model                  | FHG                | 12,999 (36.0%)                                                  | 104,234 (28.9%)     | 0.15               | 12,786 (36.0%)                       | 12,877 (36.2%)     | 0.01               |

|                          |              |                   |                    |      |                   |                   |      |
|--------------------------|--------------|-------------------|--------------------|------|-------------------|-------------------|------|
| Payment model            | FHN          | 65 (0.2%)         | 546 (0.2%)         | 0.01 | 60 (0.2%)         | 44 (0.1%)         | 0.01 |
| Payment model            | FHO          | 9,459<br>(26.2%)  | 103,862<br>(28.8%) | 0.06 | 9,386<br>(26.4%)  | 9,509<br>(26.7%)  | 0.01 |
| Payment model            | FHT          | 7,379<br>(20.4%)  | 95,449<br>(26.5%)  | 0.14 | 7,197<br>(20.2%)  | 7,024<br>(19.8%)  | 0.01 |
| Payment model            | Other        | 1,862 (5.2%)      | 16,983<br>(4.7%)   | 0.02 | 1,819<br>(5.1%)   | 1,999<br>(5.6%)   | 0.02 |
| April-June               |              | 9,502<br>(26.3%)  | 92,731<br>(25.7%)  | 0.01 | 9,393<br>(26.4%)  | 9,392<br>(26.4%)  | 0    |
| July-September           |              | 9,227<br>(25.5%)  | 85,948<br>(23.9%)  | 0.04 | 8,990<br>(25.3%)  | 8,785<br>(24.7%)  | 0.01 |
| October-November         |              | 8,057<br>(22.3%)  | 85,821<br>(23.8%)  | 0.04 | 7,958<br>(22.4%)  | 8,108<br>(22.8%)  | 0.01 |
| CWC recommendation       | Post-release | 25,202<br>(69.8%) | 253,234<br>(70.3%) | 0.01 | 24,838<br>(69.9%) | 25,206<br>(70.9%) | 0.02 |
| Quarter                  | 1            | 1,084 (3.0%)      | 10,796<br>(3.0%)   | 0    | 1,077<br>(3.0%)   | 1,119<br>(3.1%)   | 0.01 |
| Quarter                  | 2            | 1,144 (3.2%)      | 9,868 (2.7%)       | 0.03 | 1,124<br>(3.2%)   | 1,040<br>(2.9%)   | 0.01 |
| Quarter                  | 3            | 981 (2.7%)        | 9,771 (2.7%)       | 0    | 941 (2.6%)        | 961 (2.7%)        | 0    |
| Quarter                  | 4            | 915 (2.5%)        | 8,645 (2.4%)       | 0.01 | 906 (2.5%)        | 901 (2.5%)        | 0    |
| Quarter                  | 5            | 1,164 (3.2%)      | 10,919<br>(3.0%)   | 0.01 | 1,148<br>(3.2%)   | 1,068<br>(3.0%)   | 0.01 |
| Quarter                  | 6            | 1,121 (3.1%)      | 10,363<br>(2.9%)   | 0.01 | 1,085<br>(3.1%)   | 1,005<br>(2.8%)   | 0.01 |
| Quarter                  | 7            | 980 (2.7%)        | 10,120<br>(2.8%)   | 0.01 | 970 (2.7%)        | 932 (2.6%)        | 0.01 |
| Quarter                  | 8            | 841 (2.3%)        | 9,231 (2.6%)       | 0.02 | 825 (2.3%)        | 808 (2.3%)        | 0    |
| Quarter                  | 9            | 1,097 (3.0%)      | 11,329<br>(3.1%)   | 0.01 | 1,101<br>(3.1%)   | 1,043<br>(2.9%)   | 0.01 |
| Quarter                  | 10           | 1,180 (3.3%)      | 11,386<br>(3.2%)   | 0.01 | 1,139<br>(3.2%)   | 1,069<br>(3.0%)   | 0.01 |
| Quarter                  | 11           | 1,043 (2.9%)      | 11,434<br>(3.2%)   | 0.02 | 1,029<br>(2.9%)   | 994 (2.8%)        | 0.01 |
| Quarter                  | 12           | 2,353 (6.5%)      | 24,805<br>(6.9%)   | 0.01 | 2,333<br>(6.6%)   | 2,421<br>(6.8%)   | 0.01 |
| Quarter                  | 13           | 6,157<br>(17.0%)  | 59,687<br>(16.6%)  | 0.01 | 6,067<br>(17.1%)  | 6,162<br>(17.3%)  | 0.01 |
| Quarter                  | 14           | 5,782<br>(16.0%)  | 54,331<br>(15.1%)  | 0.03 | 5,642<br>(15.9%)  | 5,671<br>(16.0%)  | 0    |
| Quarter                  | 15           | 5,053<br>(14.0%)  | 54,496<br>(15.1%)  | 0.03 | 5,018<br>(14.1%)  | 5,221<br>(14.7%)  | 0.02 |
| Quarter                  | 16           | 5,224<br>(14.5%)  | 52,948<br>(14.7%)  | 0.01 | 5,147<br>(14.5%)  | 5,137<br>(14.4%)  | 0    |
| <20 y since graduation   | 1            | 9,187<br>(25.4%)  | 99,621<br>(27.7%)  | 0.05 | 9,043<br>(25.4%)  | 8,683<br>(24.4%)  | 0.02 |
| 20-30 y since graduation | 2            | 10,202<br>(28.2%) | 101,524<br>(28.2%) | 0    | 10,023<br>(28.2%) | 9,961<br>(28.0%)  | 0    |
| >30 y since graduation   | 3            | 16,730<br>(46.3%) | 158,984<br>(44.1%) | 0.04 | 16,486<br>(46.4%) | 16,908<br>(47.6%) | 0.02 |
| Male physician           | Yes          | 26,056<br>(72.1%) | 242,119<br>(67.2%) | 0.11 | 25,721<br>(72.3%) | 25,721<br>(72.3%) | 0    |
| IMG                      | Yes          | 11,636<br>(32.2%) | 89,274<br>(24.8%)  | 0.17 | 11,451<br>(32.2%) | 11,056<br>(31.1%) | 0.02 |

Notes: CWC = Choosing Wisely Canada; FHG = family health group; FHN = family health network; FHO = family health organization; FHT = family health team; IMG = international medical graduate.



**eTable 5.** 2x2 Tables for McNemar’s Test of Correlated Binary Proportions for Overall Matched Sample and Sample Stratified by History of Hypertension.

**a) All patients in the matched sample.**

|                             | NSAID within 7 d = No       |                            | Total  |
|-----------------------------|-----------------------------|----------------------------|--------|
|                             | Any secondary outcome = Yes | Any secondary outcome = No |        |
| NSAID within 7 d = Yes      | 4                           | 304                        | 308    |
| Any secondary outcome = Yes | 296                         | 34,948                     | 35,344 |
| Any secondary outcome = No  |                             |                            |        |
| Total                       | 300                         | 35,252                     | 35,552 |

Absolute risk difference (exposed versus unexposed) = 0.0003.  
 $X^2(1)=0.11$ ; p-value = 0.74.

**b) Matched sample excluding patients without hypertension.**

|                             | NSAID within 7 d = No       |                            | Total  |
|-----------------------------|-----------------------------|----------------------------|--------|
|                             | Any secondary outcome = Yes | Any secondary outcome = No |        |
| NSAID within 7 d = Yes      | 4                           | 293                        | 297    |
| Any secondary outcome = Yes | 271                         | 33,732                     | 34,003 |
| Any secondary outcome = No  |                             |                            |        |
| Total                       | 275                         | 34,025                     | 34,300 |

Absolute risk difference (exposed versus unexposed) = 0.0003; 95% CI (-0.001 to 0.002).  $X^2(1)=0.20$ ; p-value = 0.65.

**c) Matched sample excluding patients with hypertension.**

|                             | NSAID within 7 d = No       |                            | Total |
|-----------------------------|-----------------------------|----------------------------|-------|
|                             | Any secondary outcome = Yes | Any secondary outcome = No |       |
| NSAID within 7 d = Yes      | 0                           | 11                         | 11    |
| Any secondary outcome = Yes | 25                          | 1,216                      | 1,241 |
| Any secondary outcome = No  |                             |                            |       |
| Total                       | 25                          | 1,227                      | 1,252 |

Absolute risk difference (exposed versus unexposed) = -0.021; 95% CI (-0.021 to -0.002).  $X^2(1)=5.4$ ; p-value = 0.02.

**eFigure 1.** Prescription Nonsteroidal Anti-inflammatory Drug (NSAID) Use by Health Region (LHIN), 2010-11 to 2015-16.

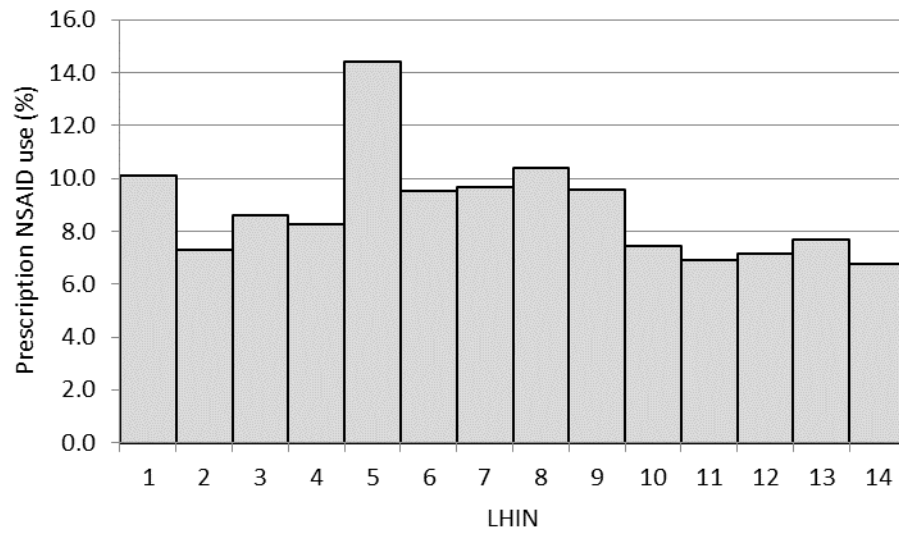

**eFigure 2.** Prescription Nonsteroidal Anti-inflammatory Drug (NSAID) Use by Primary Care Practice Group, 2010-11 to 2015-16.

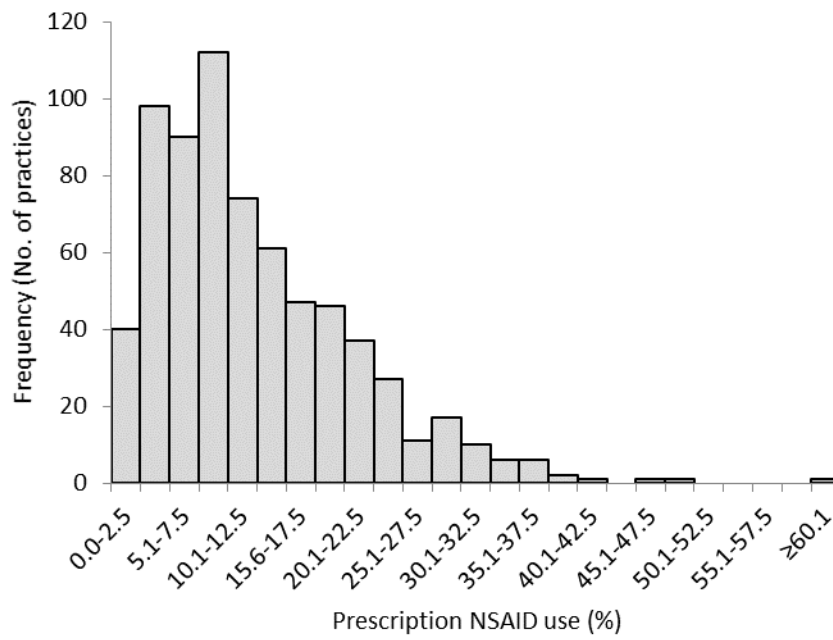

Supplement: jamainternmed-178-1516-s001.pdf [file jamainternmed-178-1516-s001.pdf]
